# Supplementary material
Source: PubMed Central journal article supplement (PMC6289251)

## Supplementary Information

### I. NCBI SRA Accessions

All WGS datasets are available via NCBI SRA under Bioproject PRJNA477326.

| Sample                   | SRA BioSample Name | Category         | SRA BioSample Accession |
|--------------------------|--------------------|------------------|-------------------------|
| Patient 1 stool day -4   | p1_meta_1          | stool metagenome | SAMN09464888            |
| Patient 1 stool day 3    | p1_meta_2          | stool metagenome | SAMN09464889            |
| Patient 2 stool day -7   | p2_meta_1          | stool metagenome | SAMN09464890            |
| Patient 2 stool day 0    | p2_meta_2          | stool metagenome | SAMN09464891            |
| Patient 2 stool day 7    | p2_meta_3          | stool metagenome | SAMN09464892            |
| Patient 3 stool day -41  | p3_meta_1          | stool metagenome | SAMN09464893            |
| Patient 3 stool day -40  | p3_meta_2          | stool metagenome | SAMN09464894            |
| Patient 3 stool day -33  | p3_meta_3          | stool metagenome | SAMN09464895            |
| Patient 3 stool day -32  | p3_meta_4          | stool metagenome | SAMN09464896            |
| Patient 3 stool day -27  | p3_meta_5          | stool metagenome | SAMN09464897            |
| Patient 3 stool day 8    | p3_meta_6          | stool metagenome | SAMN09464898            |
| Patient 4 stool day -58  | p4_meta_1          | stool metagenome | SAMN09464899            |
| Patient 4 stool day -52  | p4_meta_2          | stool metagenome | SAMN09464900            |
| Patient 4 stool day -43  | p4_meta_3          | stool metagenome | SAMN09464901            |
| Patient 4 stool day -38  | p4_meta_4          | stool metagenome | SAMN09464902            |
| Patient 4 stool day -30  | p4_meta_5          | stool metagenome | SAMN09464903            |
| Patient 4 stool day -24  | p4_meta_6          | stool metagenome | SAMN09464904            |
| Patient 4 stool day 4    | p4_meta_7          | stool metagenome | SAMN09464905            |
| Patient 4 stool day 25   | p4_meta_8          | stool metagenome | SAMN09464906            |
| Patient 5 stool day -7   | p5_meta_1          | stool metagenome | SAMN09464907            |
| Patient 5 stool day 7    | p5_meta_2          | stool metagenome | SAMN09464908            |
| Patient 6 stool day -28  | p6_meta_1          | stool metagenome | SAMN09464909            |
| Patient 7 stool day -51  | p7_meta_1          | stool metagenome | SAMN09464910            |
| Patient 7 stool day -30  | p7_meta_2          | stool metagenome | SAMN09464911            |
| Patient 7 stool day -16  | p7_meta_3          | stool metagenome | SAMN09464912            |
| Patient 7 stool day -9   | p7_meta_4          | stool metagenome | SAMN09464913            |
| Patient 8 stool day -7   | p8_meta_1          | stool metagenome | SAMN09464914            |
| Patient 8 stool day 0    | p8_meta_2          | stool metagenome | SAMN09464915            |
| Patient 9 stool day -32  | p9_meta_1          | stool metagenome | SAMN09464916            |
| Patient 9 stool day -18  | p9_meta_2          | stool metagenome | SAMN09464917            |
| Patient 9 stool day -11  | p9_meta_3          | stool metagenome | SAMN09464918            |
| Patient 9 stool day -4   | p9_meta_4          | stool metagenome | SAMN09464919            |
| Patient 9 stool day 4    | p9_meta_5          | stool metagenome | SAMN09464920            |
| Patient 10 stool day -3  | p10_meta_1         | stool metagenome | SAMN09464921            |
| Patient 11 stool day -35 | p11_meta_1         | stool metagenome | SAMN09464922            |
| Patient 12 stool day -42 | p12_meta_1         | stool metagenome | SAMN09464923            |
| Patient 12 stool day -35 | p12_meta_2         | stool metagenome | SAMN09464924            |
| Patient 12 stool day -21 | p12_meta_3         | stool metagenome | SAMN09464925            |
| Patient 12 stool day -14 | p12_meta_4         | stool metagenome | SAMN09464926            |
| Patient 13 stool day -1  | p13_meta_1         | stool metagenome | SAMN09464927            |
| Patient 14 stool day -9  | p14_meta_1         | stool metagenome | SAMN09464928            |
| Patient 14 stool day 19  | p14_meta_2         | stool metagenome | SAMN09464929            |
| Patient 15 stool day -33 | p15_meta_1         | stool metagenome | SAMN09464930            |
| Patient 15 stool day -12 | p15_meta_2         | stool metagenome | SAMN09464931            |
| Patient 16 stool day -10 | p16_meta_1         | stool metagenome | SAMN09464932            |
| Patient 16 stool day -3  | p16_meta_2         | stool metagenome | SAMN09464933            |
| Patient 17 stool day -12 | p17_meta_1         | stool metagenome | SAMN09464934            |
| Patient 17 stool day -11 | p17_meta_2         | stool metagenome | SAMN09464935            |
| Patient 17 stool day -5  | p17_meta_3         | stool metagenome | SAMN09464936            |
| Patient 17 stool day 4   | p17_meta_4         | stool metagenome | SAMN09464937            |
| Patient 18 stool day -16 | p18_meta_1         | stool metagenome | SAMN09464938            |
| Patient 19 stool day -7  | p19_meta_1         | stool metagenome | SAMN09464939            |
| Patient 19 stool day 0   | p19_meta_2         | stool metagenome | SAMN09464940            |

|                                           |            |                     |              |
|-------------------------------------------|------------|---------------------|--------------|
| Patient 20 stool day -16                  | p20_meta_1 | stool metagenome    | SAMN09464941 |
| Patient 21 stool day -7                   | p21_meta_1 | stool metagenome    | SAMN09464942 |
| Patient 21 stool day 0                    | p21_meta_2 | stool metagenome    | SAMN09464943 |
| Patient 22 stool day -15                  | p22_meta_1 | stool metagenome    | SAMN09464944 |
| Patient 22 stool day -8                   | p22_meta_2 | stool metagenome    | SAMN09464945 |
| Patient 23 stool day -10                  | p23_meta_1 | stool metagenome    | SAMN09464946 |
| Patient 23 stool day 6                    | p23_meta_2 | stool metagenome    | SAMN09464947 |
| Patient 24 stool day -13                  | p24_meta_1 | stool metagenome    | SAMN09464948 |
| Patient 24 stool day -11                  | p24_meta_2 | stool metagenome    | SAMN09464949 |
| Patient 24 stool day -4                   | p24_meta_3 | stool metagenome    | SAMN09464950 |
| Patient 24 stool day -1                   | p24_meta_4 | stool metagenome    | SAMN09464951 |
| Patient 24 stool day 31                   | p24_meta_5 | stool metagenome    | SAMN09464952 |
| Patient 25 stool day -11                  | p25_meta_1 | stool metagenome    | SAMN09464953 |
| Patient 25 stool day 3                    | p25_meta_2 | stool metagenome    | SAMN09464954 |
| Patient 26 stool day -11                  | p26_meta_1 | stool metagenome    | SAMN09464955 |
| Patient 26 stool day -4                   | p26_meta_2 | stool metagenome    | SAMN09464956 |
| Patient 27 stool day 0                    | p27_meta_1 | stool metagenome    | SAMN09464957 |
| Patient 28 stool day -12                  | p28_meta_1 | stool metagenome    | SAMN09464958 |
| Patient 28 stool day -10                  | p28_meta_2 | stool metagenome    | SAMN09464959 |
| Patient 28 stool day -9                   | p28_meta_3 | stool metagenome    | SAMN09464960 |
| Patient 28 stool day -3                   | p28_meta_4 | stool metagenome    | SAMN09464961 |
| Patient 28 stool day 5                    | p28_meta_5 | stool metagenome    | SAMN09464962 |
| Patient 29 stool day -12                  | p29_meta_1 | stool metagenome    | SAMN09464963 |
| Patient 29 stool day -8                   | p29_meta_2 | stool metagenome    | SAMN09464964 |
| Patient 29 stool day -3                   | p29_meta_3 | stool metagenome    | SAMN09464965 |
| Patient 29 stool day 0                    | p29_meta_4 | stool metagenome    | SAMN09464966 |
| Patient 30 stool day -10                  | p30_meta_1 | stool metagenome    | SAMN09464967 |
| Patient 30 stool day -3                   | p30_meta_2 | stool metagenome    | SAMN09464968 |
| Patient 30 stool day 4                    | p30_meta_3 | stool metagenome    | SAMN09464969 |
| Patient 1 Staphylococcus aureus BSI       | p1_bsi_1   | bloodstream isolate | SAMN09466919 |
| Patient 2 Enterobacter cloacae BSI        | p2_bsi_1   | bloodstream isolate | SAMN09466920 |
| Patient 2 Klebsiella pneumoniae BSI       | p2_bsi_2   | bloodstream isolate | SAMN09466921 |
| Patient 3 Escherichia coli BSI            | p3_bsi_1   | bloodstream isolate | SAMN09466922 |
| Patient 3 Staphylococcus aureus BSI       | p3_bsi_2   | bloodstream isolate | SAMN09466923 |
| Patient 4 Staphylococcus aureus BSI       | p4_bsi_1   | bloodstream isolate | SAMN09466924 |
| Patient 5 Staphylococcus aureus BSI       | p5_bsi_1   | bloodstream isolate | SAMN09466925 |
| Patient 6 Klebsiella oxytoca BSI          | p6_bsi_1   | bloodstream isolate | SAMN09466926 |
| Patient 7 Escherichia coli BSI            | p7_bsi_1   | bloodstream isolate | SAMN09466927 |
| Patient 8 Rothia mucilaginosa BSI         | p8_bsi_1   | bloodstream isolate | SAMN09466928 |
| Patient 9 Escherichia coli BSI            | p9_bsi_1   | bloodstream isolate | SAMN09466929 |
| Patient 10 Staphylococcus aureus BSI      | p10_bsi_1  | bloodstream isolate | SAMN09466930 |
| Patient 11 Escherichia coli BSI           | p11_bsi_1  | bloodstream isolate | SAMN09466931 |
| Patient 12 Staphylococcus aureus BSI      | p12_bsi_1  | bloodstream isolate | SAMN09466932 |
| Patient 13 Staphylococcus epidermidis BSI | p13_bsi_1  | bloodstream isolate | SAMN09466933 |
| Patient 14 Klebsiella pneumoniae BSI      | p14_bsi_1  | bloodstream isolate | SAMN09466934 |
| Patient 15 Staphylococcus epidermidis BSI | p15_bsi_1  | bloodstream isolate | SAMN09466935 |
| Patient 16 Streptococcus mitis BSI        | p16_bsi_1  | bloodstream isolate | SAMN09466936 |
| Patient 17 Streptococcus mitis BSI        | p17_bsi_1  | bloodstream isolate | SAMN09466937 |
| Patient 18 Staphylococcus epidermidis BSI | p18_bsi_1  | bloodstream isolate | SAMN09466938 |
| Patient 19 Pseudomonas aeruginosa BSI     | p19_bsi_1  | bloodstream isolate | SAMN09466939 |
| Patient 20 Staphylococcus epidermidis BSI | p20_bsi_1  | bloodstream isolate | SAMN09466940 |
| Patient 21 Staphylococcus aureus BSI      | p21_bsi_1  | bloodstream isolate | SAMN09466941 |
| Patient 22 Streptococcus mitis BSI        | p22_bsi_1  | bloodstream isolate | SAMN09466942 |
| Patient 23 Enterococcus faecium BSI       | p23_bsi_1  | bloodstream isolate | SAMN09466943 |
| Patient 24 Rothia mucilaginosa BSI        | p24_bsi_1  | bloodstream isolate | SAMN09466944 |
| Patient 25 Enterococcus faecium BSI       | p25_bsi_1  | bloodstream isolate | SAMN09466945 |
| Patient 26 Streptococcus mitis BSI        | p26_bsi_1  | bloodstream isolate | SAMN09466946 |
| Patient 27 Staphylococcus aureus BSI      | p27_bsi_1  | bloodstream isolate | SAMN09466947 |
| Patient 28 Streptococcus mitis BSI        | p28_bsi_1  | bloodstream isolate | SAMN09466948 |
| Patient 29 Streptococcus mitis BSI        | p29_bsi_1  | bloodstream isolate | SAMN09466949 |
| Patient 30 Streptococcus mitis BSI        | p30_bsi_1  | bloodstream isolate | SAMN09466950 |

## II. Supplementary Figures

Figure S1. Stool sampling relative to hematopoietic cell transplantation (HCT) and engraftment

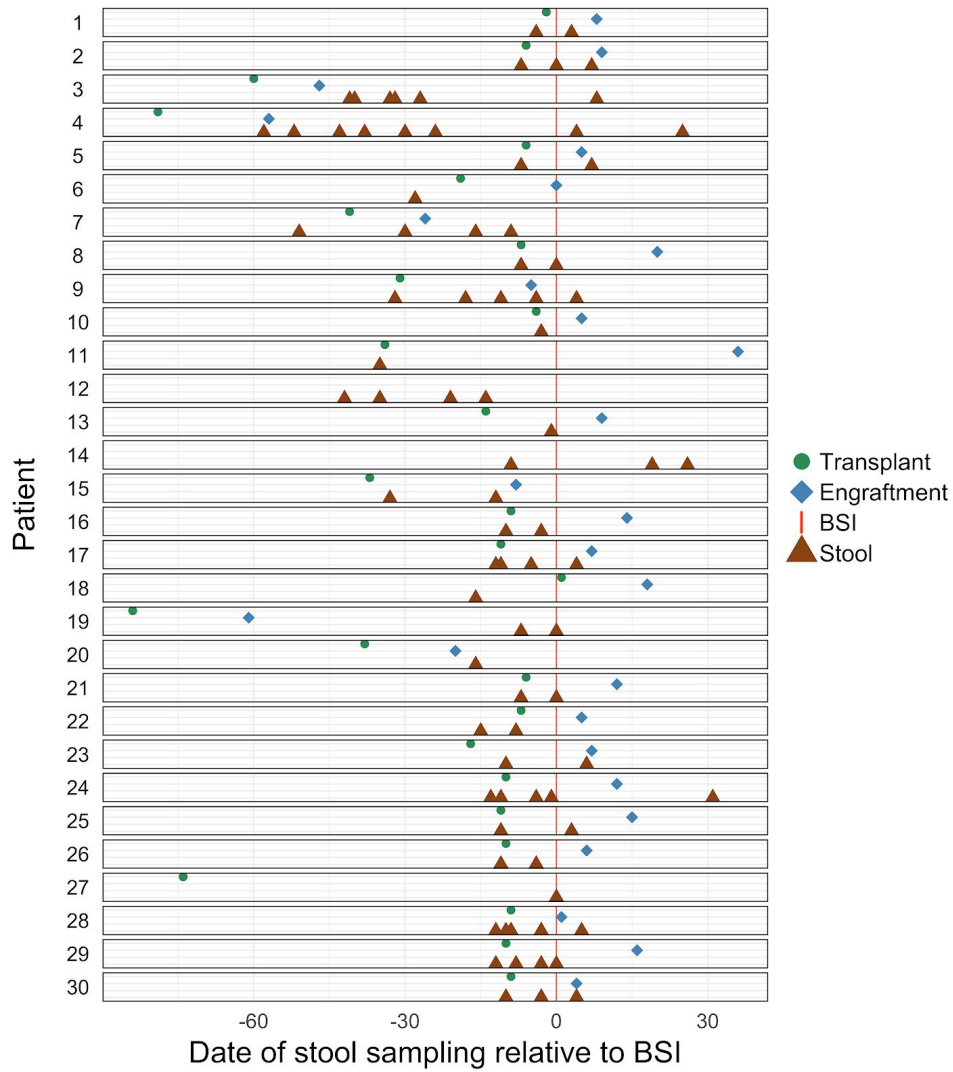

Timeline of stool sampling, transplantation, and engraftment relative to bloodstream infection (BSI) for patients in the study cohort. Engraftment and HCT occurred more than 100 days prior to BSI for patients 12 and 14 and are therefore not displayed. Engraftment could not be assessed for patient 27 as the patient did not become neutropenic.

**Figure S2. StrainSifter workflow**

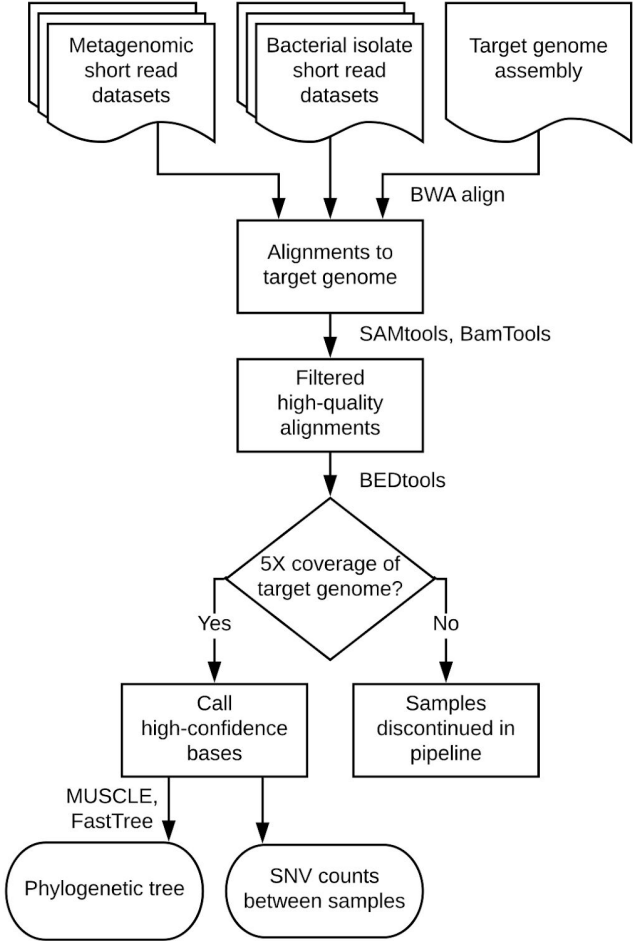

Flowchart showing input, analysis steps, and output of the StrainSifter pipeline.

**Figure S3. Phylogenetic trees of gut and bloodstream infection (BSI) strains with publicly available references**

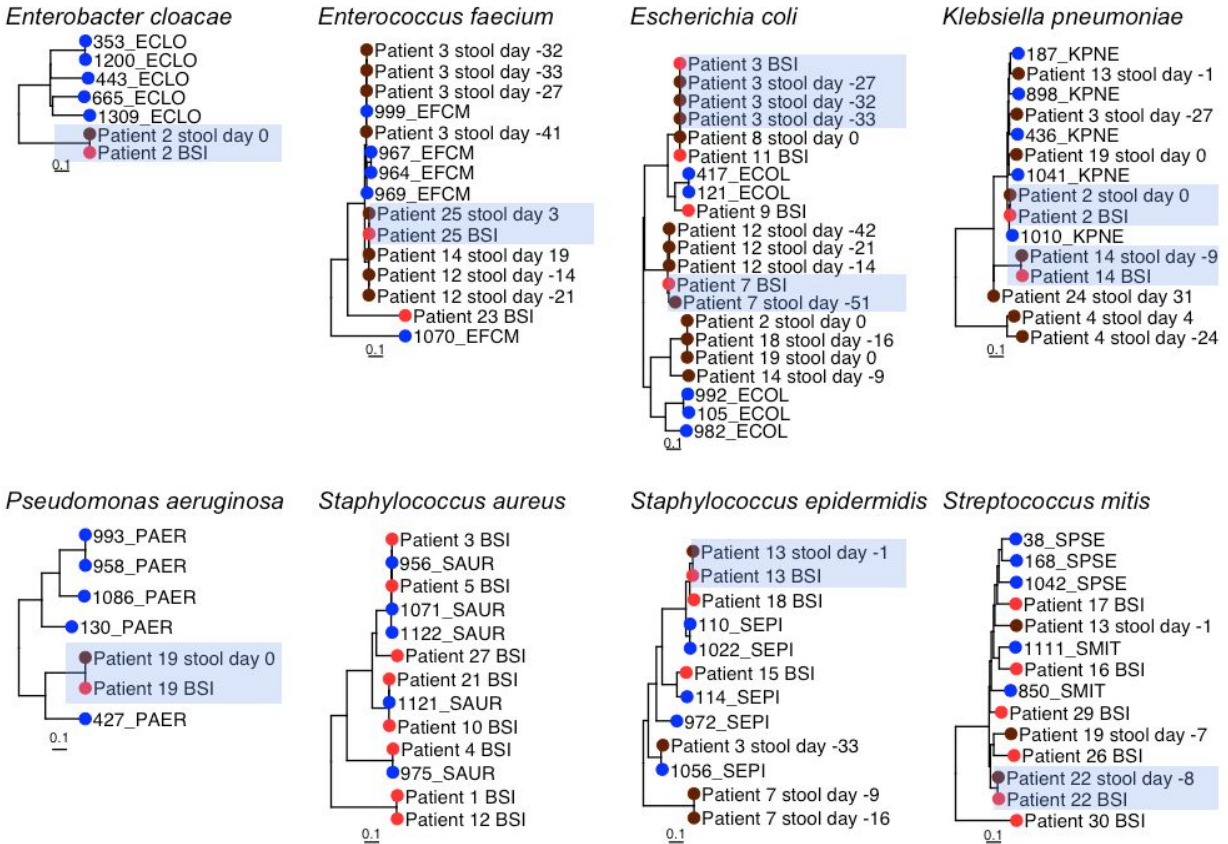

Phylogenetic relatedness between bacterial strains in our sample collection and publicly-available reference strains isolated from intensive care unit patients at the University of Washington Medical Center (NCBI BioProject PRJNA267549) as assessed by StrainSifter. Branch tip colors indicate stool metagenomes (brown), BSIs (red), and reference strains (blue). Samples from the same patient are more closely phylogenetically related to each other (blue highlight) than to samples from other patients. Days given are relative to BSI. Though patient 20's BSI is classified as *S. epidermidis*, this strain does not meet the coverage requirements for inclusion in the *S. epidermidis* phylogenetic tree.

### III. Computational methods supplement

StrainSifter is implemented as a Snakemake workflow packaged with conda and is available for download at <https://github.com/bhattlab/StrainSifter> along with all source code. The following is an overview of the component steps in the workflow with example commands.

#### *Computational methods*

1. Align short reads to reference genome using Burrows-Wheeler aligner (BWA); filter alignments on mapping quality (mapq)  $\geq 60$ ; filter reads with 5 or fewer mismatches:

```
bwa mem -t 8 {reference}.fna {sample}.fastq | samtools view -b  
-q 60 | bamtools filter -tag 'NM:<=5' | samtools sort --threads  
8 -o {sample}.filtered.bam
```

Input:

Reference genome {reference}.fna  
WGS fastq: {sample}.fastq

Output:

{sample}.filtered.bam

2. Calculate average coverage per alignment with bedtools:

```
bedtools genomecov -ibam {sample}.bam > {sample}.tsv
```

Process with python to determine samples that meet the coverage requirements.

Script:

getCoverage.py

Input: {sample}.tsv

Output: {sample}.cvg

3. Filter samples meeting coverage requirements using bash/Python in Snakemake (default: 5X coverage over 50% of the genome)
4. Create pileup file for each sample meeting coverage requirements using samtools mpileup:

```
samtools mpileup -f reference.fna -B -aa -o {sample}.pileup  
{sample}.bam
```

Parameters:

-B -- report Phred scores instead of BAQ

-aa -- report every position in ref

Input: {sample}.bam

Output: {sample}.pileup

5. Call SNVs -- only consider positions covered by at least 5 reads; consider only bases with a minimum phred score of 20; call a base only if the frequency exceeds 0.8:

Script:

callSNPs.py

Parameters (default):

Min coverage (5)

Min base frequency (0.8)

Min phred score (20)

Input: {sample}.pileup

Output: {sample}.tsv

6. Tree building

- a. Obtain consensus sequence from each pileup file in bash

Input: {sample}.tsv

Output: {sample}.txt

- b. Find core positions among samples from each species -- positions where a non-"N" base call is made in every sample:

Script:

findCoreSNPs.py

Input: {sample}.txt consensus sequence files for each sample

Output: {reference}.tsv

- c. Generate fasta of concatenated SNVs:

Script:

coreSNPs2fasta.py

Input: {reference}.tsv

Output: {reference}.fasta

- d. Multi-alignment of SNV fasta with MUSCLE:

```
muscle -in {reference}.fasta -out {reference}.afa
```

- e. Compute approximate maximum-likelihood tree with FastTree:

```
Fasttree -nt {reference}.afa > {reference}.tree
```

## 7. Count SNVs between samples

Script: pairwiseDist.py

Input: {sample}.txt consensus sequence files for each sample

Output: {reference}.dist.tsv

### *Rationale for variant-calling frequency cutoff*

We performed SNV calling and counted SNVs between a pair of gut and BSI samples, incrementing the minimum proportion to call a base from 0 to 1. By 0.7 we approach an asymptote, suggesting an appropriate minimum frequency parameter is 0.7-0.8.

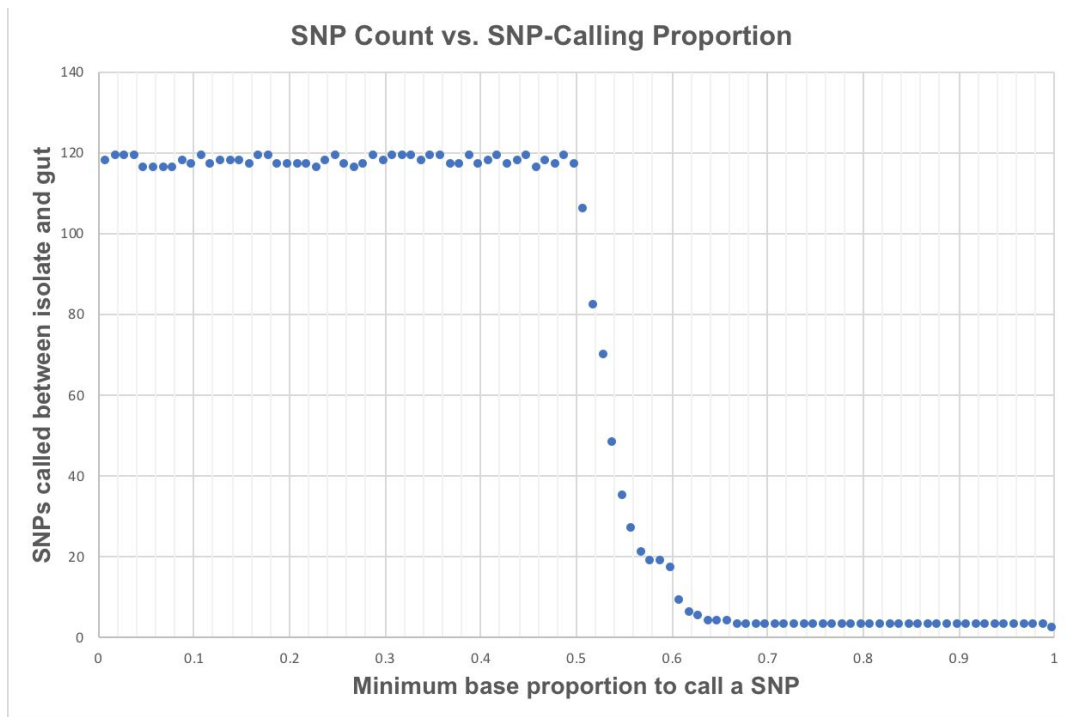

Supplement: NIHMS1504517-supplement-1.pdf [file NIHMS1504517-supplement-1.pdf]
